# Supplementary material for: Maximization of information transmission influences selection of native phosphorelay architectures
Source: PeerJ journal article supplement (doi:10.7717/peerj.11558), 2021-06-10
Supplement: Table_S1.pdf [file Table_S1.pdf]

**Table S2** – Phosphorelay circuits for which there is abundance information.

| Organism (average cell volume in $\mu\text{m}^3$ )         | Phosphorelay                              | Protein abundances (ppm)  | Estimated number of proteins per cell <sup>1</sup> | Ratios of abundance (order of magnitude) |
|------------------------------------------------------------|-------------------------------------------|---------------------------|----------------------------------------------------|------------------------------------------|
| <i>Saccharomyces cerevisiae</i> (~ 70 <sup>79</sup> )      | Sln1:Ypd1:Ssk1<br>HKRR:Hpt:RR             | 151:188:177 <sup>80</sup> | 66000: 82000: 77000                                | 1:1:1:1                                  |
|                                                            | Sln1:Ypd1:Skn7<br>HKRR:Hpt:RR             | 151:188:175 <sup>80</sup> | 66000: 82000: 77000                                | 1:1:1:1                                  |
| <i>Schizosaccharomyces pombe</i> (~ 100 <sup>81,82</sup> ) | Mak1:Mpr1:Mcs4<br>HKRR:Hpt:RR             | 44:62:470 <sup>83</sup>   | 11000: 39000: 293000                               | 1:1:1:10                                 |
|                                                            | Mak2:Mpr1:Mcs4<br>HKRR:Hpt:RR             | 53:62:470 <sup>83</sup>   | 33000: 39000: 293000                               | 1:1:1:10                                 |
|                                                            | Mak3:Mpr1:Mcs4<br>HKRR:Hpt:RR             | 53:62:470 <sup>83</sup>   | 33000: 39000: 293000                               | 1:1:1:10                                 |
| <i>Cryptococcus neoformans</i> (~ 50-70 <sup>84</sup> )    | CNH02350<br>HKRRHptRR                     | 2.63 <sup>85</sup>        | 980                                                | 1:1:1:1                                  |
|                                                            | CNC03340:CNM01530:CNB03090<br>HKRR:Hpt:RR | 42:367:14 <sup>85</sup>   | 16000: 137000: 5000                                | 10:10:100:1                              |
|                                                            | CNA03400:CNM01530:CNB03090<br>HKRR:Hpt:RR | 3:367:14 <sup>85</sup>    | 1000: 137000: 5000                                 | 1:1:100:1                                |

<sup>1</sup> This number is calculated by multiplying cell volume ( $\mu\text{m}^3$ ) by the average number of proteins in cells per  $\mu\text{m}^3$  times the protein abundance in parts per million:

$$\frac{\text{Cell Volume} \times 6.23 \times 10^6 \times \text{Protein abundances}}{10^6}$$

10<sup>6</sup>

| Organism (average cell volume in $\mu\text{m}^3$ ) | Phosphorelay                                     | Protein abundances (ppm)       | Estimated number of proteins per cell <sup>2</sup> | Ratios of abundance (order of magnitude) |
|----------------------------------------------------|--------------------------------------------------|--------------------------------|----------------------------------------------------|------------------------------------------|
| <i>Arabidopsis thaliana</i> (2000 <sup>86</sup> )  | AKH2:AHP1-AHP4<br>HKRRRR:Hpt                     | 0.15:8-50 <sup>87</sup>        | 2000: 99000-623000                                 | 1:1:10:1<br>1:1:100:1                    |
|                                                    | AKH3:AHP1-AHP4<br>HKRRRR:Hpt                     | 1: 8-50 <sup>87</sup>          | 12000: 99000-623000                                | 1:1:10:1<br>1:100:1:1                    |
|                                                    | AKH4:AHP1-AHP4<br>HKRRRR:Hpt                     | 0.62: 8-50 <sup>87</sup>       | 8000:99000-623000                                  | 1:1:10:1<br>1:1:100:1                    |
|                                                    | AHK1:AHP2-AHP3:ARR1-3,5,7,9,14,16<br>HKRR:Hpt:RR | 0.3:15-50:0.01-2 <sup>87</sup> | 4000: 187000-623000:100-25000                      | 1:1:100:1<br>1:1:100:10<br>10:10:1000:1  |
|                                                    | AHK5:Ahp1-3, AHP5-6:ARR1-2<br>HKRR:Hpt:RR        | 0.1:9-50:2 <sup>87</sup>       | 1200: 112000-623000: 25000                         | 1:1:100:10                               |
|                                                    | ETR1:AHP5:RR1-2<br>HKRR:Hpt:RR                   | 2.5:0.02:2 <sup>87</sup>       | 31000: 250-623000: 25000                           | 1:1:1:1<br>10:10:1:10                    |

<sup>2</sup> This number is calculated by multiplying cell volume ( $\mu\text{m}^3$ ) by the average number of proteins in cells per  $\mu\text{m}^3$  times the protein abundance in parts per million:

$$\frac{\text{Cell Volume} \times 6.23 \times 10^6 \times \text{Protein abundances}}{10^6}$$

10<sup>6</sup>

| Organism (average cell volume in $\mu\text{m}^3$ )      | Phosphorelay         | Protein abundances (ppm)    | Estimated number of proteins per cell <sup>3</sup> | Ratios of abundance (order of magnitude) |
|---------------------------------------------------------|----------------------|-----------------------------|----------------------------------------------------|------------------------------------------|
| <i>Escherichia coli</i><br>(~ 0.1-3 <sup>88,89</sup> )  | TorS:TorR            | 0.34:6 <sup>90,91</sup>     | 212:3728                                           | 1:1:1:10                                 |
|                                                         | HKRRHpt:RR           |                             |                                                    |                                          |
|                                                         | EvgS:EvgA            | 0.31:88 <sup>90,91</sup>    | 193:54800                                          | 1:1:1:100                                |
|                                                         | HKRRHpt:RR           |                             |                                                    |                                          |
|                                                         | BarA:UvrY            | 3.5:55 <sup>90,91</sup>     | 2180:34265                                         | 1:1:1:10                                 |
|                                                         | HKRRHpt:RR           |                             |                                                    |                                          |
|                                                         | ArcB:ArcA            | 51:1065 <sup>90,91</sup>    | 30:6600                                            | 1:1:1:10                                 |
|                                                         | HKRRHpt:RR           |                             |                                                    |                                          |
| <i>Shigella flexneri</i><br>(~ 0.1-3 <sup>88,89</sup> ) | RcsC:RcsD:RcsB       | 3.:7.4:375 <sup>90,91</sup> | 19:46: 2340                                        | 1:1:1:100                                |
|                                                         | HKRR:Hpt:RR          |                             |                                                    |                                          |
|                                                         | BarA:UvrY            | 3.94:8.74 <sup>92,93</sup>  | 24:54                                              | 1:1:1:1                                  |
|                                                         | HKRRHpt:RR           |                             |                                                    |                                          |
| <i>Pseudomonas aeruginosa</i><br>(~ 0.5 <sup>94</sup> ) | ArcB:ArcA            | 34.9:1094                   | 220:.6800                                          | 1:1:1:100                                |
|                                                         | HKRRHpt:RR           |                             |                                                    |                                          |
|                                                         | PA0413:PA0416        | 158:BDL <sup>91,95</sup>    | 580:-                                              | 1:<1                                     |
|                                                         | HKRRHpt:RR           |                             |                                                    |                                          |
| <i>Shewanella oneidensis</i><br>(1-4 <sup>96</sup> )    | PA4112               | 7.2 <sup>91,95</sup>        | 26                                                 | 1:1:1:1                                  |
|                                                         | HKRRHptRR            |                             |                                                    |                                          |
|                                                         | SO3207:SO3206:SO3209 | 452:17.1:768 <sup>91</sup>  | 2800: 110: 4800                                    | 10:1:10:10                               |
|                                                         | HKHpt:RR:RR          |                             |                                                    | 10:1:10:100                              |
| <i>Desulfovibrio vulgaris</i><br>(2.4 <sup>97</sup> )   | SO0859:SO0860        | 88:79 <sup>91</sup>         | 550:490                                            | 1:1:1:1                                  |
|                                                         | HKRRHpt:RR           |                             |                                                    |                                          |
|                                                         | DVU_3062:DVU_3061    | 80:79 <sup>98,99</sup>      | 1200:1200                                          | 1:1:1:1                                  |
|                                                         | HKRRHpt:RR           |                             |                                                    |                                          |

<sup>3</sup> These numbers are calculated by multiplying cell volume ( $\mu\text{m}^3$ ), average number of proteins in cells per  $\mu\text{m}^3$ , and the protein abundance in parts per million:

$$\frac{\text{Cell Volume} \times 6.23 \times 10^6 \times \text{Protein abundances}}{10^6}$$

10<sup>6</sup>

| Organism (average cell volume in $\mu\text{m}^3$ ) | Phosphorelay           | Protein abundances (ppm)       | Estimated number of proteins per cell <sup>4</sup> | Ratios of abundance (order of magnitude) |
|----------------------------------------------------|------------------------|--------------------------------|----------------------------------------------------|------------------------------------------|
| <i>Salmonella enterica</i><br>(0.8 <sup>94</sup> ) | RcsC:RcsD:RcsB         | 3.4:3.9:327 <sup>91</sup>      | 17:19:1600                                         | 1:1:1:100                                |
|                                                    | HKRR:Hpt:RR            |                                |                                                    |                                          |
| <i>Bacillus subtilis</i><br>(1.5 <sup>94</sup> )   | KinA:Spo0F:Spo0B:Spo0A | 1.3:446:12.4:185 <sup>91</sup> | 12:4200:110:1700                                   | 1:100:1:100                              |
|                                                    | HK:RR:Hpt:RR           |                                |                                                    |                                          |
|                                                    | KinB:Spo0F:Spo0B:Spo0A | 10:446:12.4:185 <sup>91</sup>  | 93:4200:110:1700                                   | 1:100:1:100                              |
|                                                    | HK:RR:Hpt:RR           |                                |                                                    |                                          |
|                                                    | KinC:Spo0F:Spo0B:Spo0A | 8.8:446:12.4:185 <sup>91</sup> | 82:4200:110:1700                                   | 1:100:1:100                              |
|                                                    | HK:RR:Hpt:RR           |                                |                                                    |                                          |

BDL: Below detection limit

<sup>4</sup> These numbers are calculated by multiplying cell volume ( $\mu\text{m}^3$ ), average number of proteins in cells per  $\mu\text{m}^3$ , and the protein abundance in parts per million:

$$\frac{\text{Cell Volume} \times 6.23 \times 10^6 \times \text{Protein abundances}}{10^6}$$

10<sup>6</sup>
